# Supplementary material for: A high energy-density P2-Na2/3[Ni0.3Co0.1Mn0.6]O2 cathode with mitigated P2–O2 transition for sodium-ion batteries
Source: Royal Society of Chemistry journal article supplement (doi:10.1039/c8nr09601e), 2019-01-01
Supplement: c8nr09601e1.pdf [file c8nr09601e1.pdf]

## Supporting Information for

A high energy-density P2- $\text{Na}_{2/3}[\text{Ni}_{0.3}\text{Co}_{0.1}\text{Mn}_{0.6}]\text{O}_2$  cathode with mitigated  
P2-O2 transition for sodium-ion batteries

Peiyu Hou,<sup>a†</sup> Yanyun Sun,<sup>b†</sup> Feng Li,<sup>b</sup> Yiming Sun,<sup>c</sup> Xiaolong Deng,<sup>d</sup> Hongzhou  
Zhang,<sup>\*c</sup> Xijin Xu<sup>\*a</sup> and Lianqi Zhang<sup>c</sup>

<sup>a</sup>School of Physics and Technology, University of Jinan, Jinan, 250022, China

E-mail: [sps\\_xuxj@ujn.edu.cn](mailto:sps_xuxj@ujn.edu.cn) (X. Xu)

<sup>b</sup>School of Materials Science and Engineering, National Institute for Advanced  
Materials, Nankai University, Tianjin, 300350, China

<sup>c</sup>School of Materials Science and Engineering, Tianjin University of Technology,  
Tianjin, 300384, China

E-mail: [zhanghongzhou@mail.nankai.edu.cn](mailto:zhanghongzhou@mail.nankai.edu.cn) (H. Zhang)

<sup>d</sup>School of Mathematics and Physics, Anhui University of Technology, Ma'anshan  
243032, Anhui Province, China

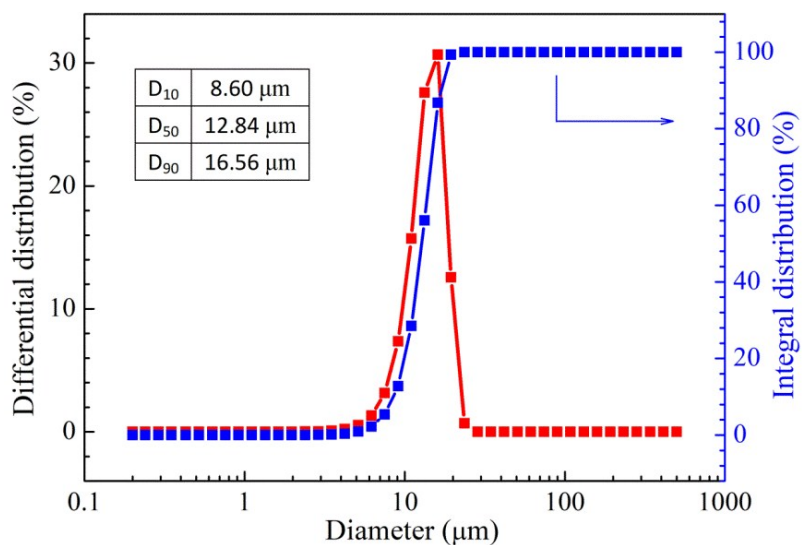

Figure S1 Particle size and distribution of the as-prepared hydroxide precursors  $[\text{Ni}_{0.3}\text{Co}_{0.1}\text{Mn}_{0.6}](\text{OH})_2$ .

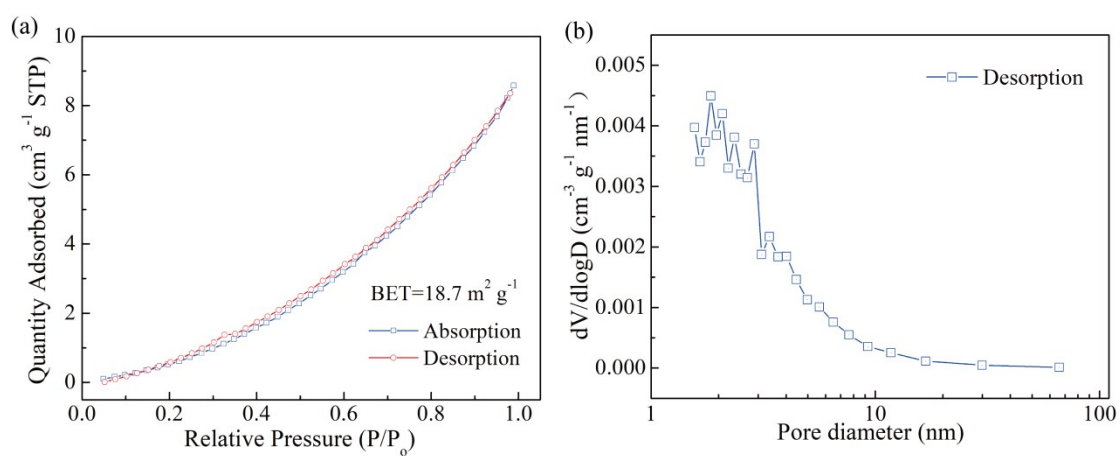

Figure S2 (a) Nitrogen adsorption/desorption isotherms at 77 K, and (b) the pore size distribution of  $\text{P2-Na}_{2/3}[\text{Ni}_{0.3}\text{Co}_{0.1}\text{Mn}_{0.6}]\text{O}_2$  cathode material.

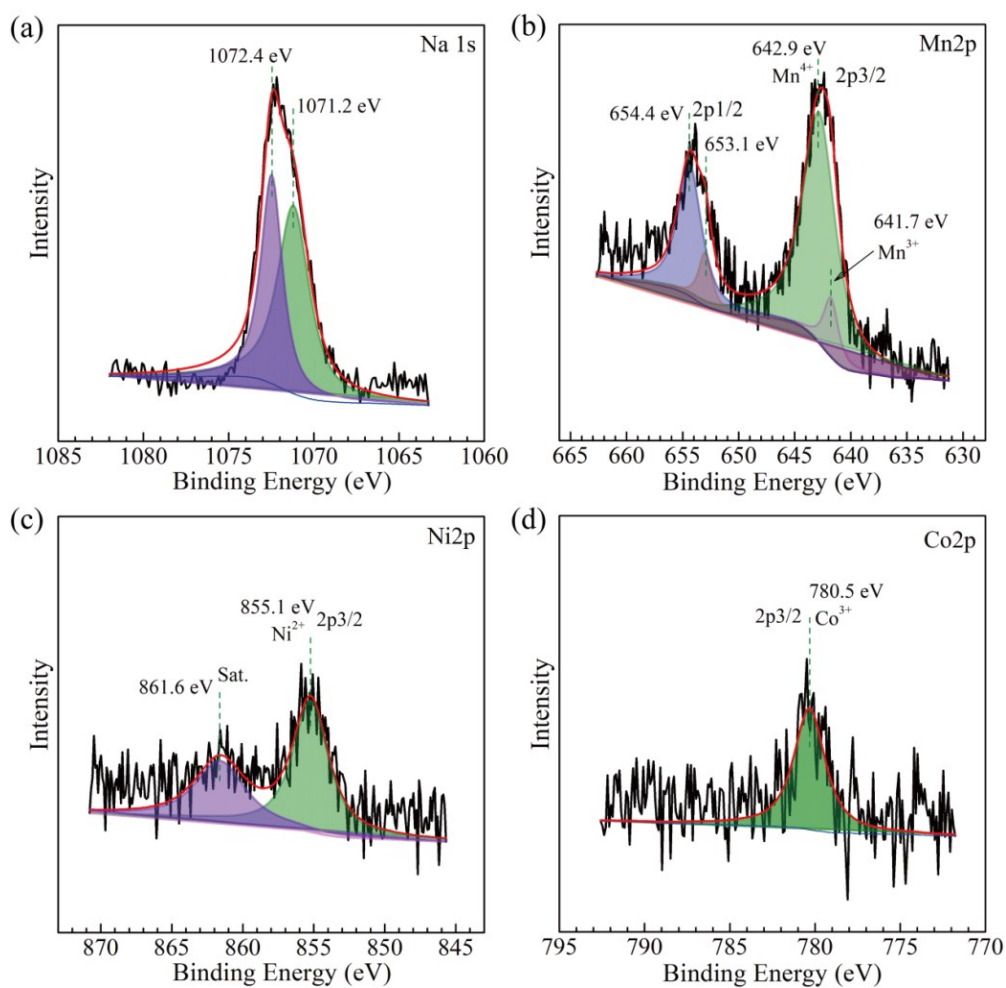

Figure S3 XPS of the pristine P2-Na<sub>2/3</sub>[Ni<sub>0.3</sub>Co<sub>0.1</sub>Mn<sub>0.6</sub>]O<sub>2</sub>: (a) Na 1s, (b) Mn 2p, (c) Ni 2p, and (d) Co 2p.

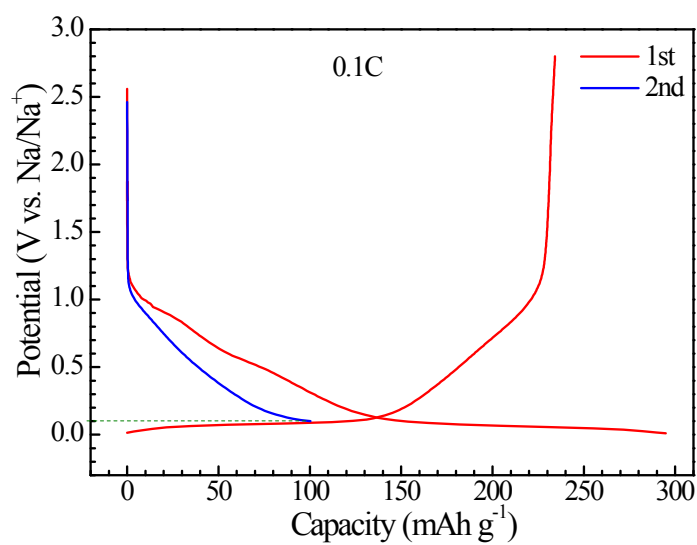

Figure S4 The charge/discharge curves of hard carbon used as anode in full-cells.

Table S1 A comparison of high-rate capability of the modified P2- $\text{Na}_{2/3}[\text{Ni}_{0.33}\text{Mn}_{0.67}]\text{O}_2$  cathodes *via* bulk doping or surface coating in the recent literatures.

| Structural formula                                                            | Modified method                        | Voltage range (V vs Na/Na <sup>+</sup> ) | Cathode loading (mg cm <sup>-2</sup> ) | Capacity at 0.1C (mAh g <sup>-1</sup> ) | Capacity at high rates (mAh g <sup>-1</sup> ) | Ref       |
|-------------------------------------------------------------------------------|----------------------------------------|------------------------------------------|----------------------------------------|-----------------------------------------|-----------------------------------------------|-----------|
| $\text{Na}_{2/3}[\text{Ni}_{0.3}\text{Co}_{0.1}\text{Mn}_{0.6}]\text{O}_2$    | Co doping                              | 2.0–4.3                                  | 2.0–2.5                                | 161.6                                   | 110 (5C)<br>91 (10C)                          | This work |
| $\text{Na}_{0.8}[\text{Li}_{0.12}\text{Ni}_{0.22}\text{Mn}_{0.66}]\text{O}_2$ | Li doping                              | 2.0–4.4                                  | NA                                     | 118                                     | 70 (5C)                                       | 1         |
| $\text{Na}_{2/3}[\text{Ni}_{1/3}\text{Mn}_{1/2}\text{Ti}_{1/6}]\text{O}_2$    | Ti doping                              | 2.5–4.35                                 | 4.1                                    | 120                                     | 90 (2C)                                       | 2         |
| $\text{Na}_{2/3}[\text{Ni}_{0.2}\text{Cu}_{0.1}\text{Mn}_{0.7}]\text{O}_2$    | Cu doping                              | 2.0–4.5                                  | NA                                     | 125                                     | 30 (5C)                                       | 3         |
| $\text{Na}_{2/3}[\text{Cu}_{1/12}\text{Ni}_{1/4}\text{Mn}_{2/3}]\text{O}_2$   | Cu doping                              | 2.5–4.4                                  | NA                                     | ~130                                    | 85 (5C)                                       | 4         |
| $\text{Na}_{2/3}[\text{Mn}_{0.67}\text{Ni}_{0.28}\text{Mg}_{0.05}]\text{O}_2$ | Mg doping                              | 2.5–4.35                                 | ~4.0                                   | 135                                     | 25 (2C)                                       | 5         |
| $\text{Na}_{2/3}[\text{Ni}_{0.23}\text{Mg}_{0.1}\text{Mn}_{0.67}]\text{O}_2$  | Mg doping                              | 2.0–4.5                                  | NA                                     | 105 (0.3C)                              | 80 (~2.5C)                                    | 6         |
| $\text{Na}_{2/3}[\text{Mn}_{0.7}\text{Ni}_{0.25}\text{Mg}_{0.05}]\text{O}_2$  | Mg doping                              | 2.0–4.5                                  | 5.81                                   | 136                                     | 105 (3C)                                      | 7         |
| $\text{Na}_{2/3}[\text{Ni}_{0.26}\text{Zn}_{0.07}\text{Mn}_{0.67}]\text{O}_2$ | Zn doping                              | 2.0–4.4                                  | NA                                     | 132                                     | 79 (5C)                                       | 8         |
| $\text{Na}_{2/3}[\text{Ni}_{1/3}\text{Fe}_{1/12}\text{Mn}_{7/12}]\text{O}_2$  | Fe doping                              | 2.2–4.4                                  | NA                                     | 141                                     | 84.6 (10C)                                    | 9         |
| $\text{Na}_{2/3}[\text{Ni}_{1/3}\text{Mn}_{2/3}]\text{O}_2$                   | Al <sub>2</sub> O <sub>3</sub> coating | 2.5–4.3                                  | 1.5                                    | 164                                     | 65.3 (3C)                                     | 10        |
| $\text{Na}_{0.5}[\text{Ni}_{0.26}\text{Cu}_{0.07}\text{Mn}_{0.67}]\text{O}_2$ | Cu doping with MgO coating             | 2.0–4.5                                  | 2.5                                    | 131                                     | 83 (5C)                                       | 11        |

## References

1. J. Xu, D. H. Lee, R. J. Clément, X. Yu, M. Leskes, A. J. Pell, G. Pintacuda, X.-Q. Yang, C. P. Grey and Y. S. Meng, *Chem. Mater.*, 2014, **26**, 1260–1269;
2. H. Yoshida, N. Yabuuchi, K. Kubota, I. Ikeuchi, A. Garsuch, M. Schulz-Dobrick and S. Komaba, *Chem. Commun.*, 2014, **50**, 3677–3680.
3. L. Wang, Y.-G. Sun, L.-L. Hu, J.-Y. Piao, J. Guo, A. Manthiram, J. Ma and A.-M. Cao, *J. Mater. Chem. A*, 2017, **5**, 8752–8761.
4. L. Zheng, J. Li, and M. N. Obrovac, *Chem. Mater.*, 2017, **29**, 1623–1631.
5. P.-F. Wang, Y. You, Y.-X. Yin, Y.-S. Wang, L.-J. Wan, L. Gu and Y.-G. Guo, *Angew. Chem. Int. Ed.*, 2016, **55**, 7445.
6. H. Hou, B. Gan, Y. Gong, N. Chen, and C. Sun, *Inorg. Chem.*, 2016, **55**, 9033–9037.
7. G. Singh, N. Tapia-Ruiz, J. M. Lopez del Amo, U. Maitra, J. W. Somerville, A. R. Armstrong, J. Martinez de Ilarduya, T. Rojo and P. G. Bruce, *Chem. Mater.*, 2016, **28**, 5087–5094.
8. X. Wu, J. Guo, D. Wang, G. Zhong, M. J. McDonald and Y. Yang, *J. Power Sources*, 2015, **281**, 18–26.
9. Q. Yang, P.-F. Wang, J.-Z. Guo, Z.-M. Chen, W.-L. Pang, K.-C. Huang, Y.-G. Guo, X.-L. Wu and J.-P. Zhang, *ACS Applied Materials & Inter.*, 2018, **10**, 34272.
10. Y. Liu, X. Fang, A. Zhang, C. Shen, Q. Liu, H. A. Enaya and C. Zhou, *Nano Energy*, 2016, **27**, 27–34.
11. H. V. Ramasamy, K. Kaliyappan, R. Thangavel, V. Aravindan, K. Kang, D. U. Kim, Y. Park, X. Sun and Y.-S. Lee, *J. Mater. Chem. A*, 2017, **5**, 8408–8415.
